# Supplementary material for: Optimized Ru catalysts for the selective cleavage of CAr–OCH3 bonds in guaiacol under mild conditions
Source: Royal Society of Chemistry journal article supplement (doi:10.1039/d4cy01260g), 2025-01-01
Supplement: d4cy01260g1.pdf [file d4cy01260g1.pdf]

## Supporting Information

### Optimized Ru Catalysts for the Selective Cleavage of C<sub>Ar</sub>-OCH<sub>3</sub> Bonds in Guaiacol Under Mild Conditions

*Chuqiao Song<sup>1</sup>, Wei Cheng<sup>1</sup>, Xiaojie Wu<sup>1</sup>, Shufang Zhao<sup>1,2\*</sup>, Ying Tang<sup>1</sup>, Xin Tang<sup>1</sup>, Yao Xu<sup>3</sup>, Lili Lin<sup>1,2\*</sup>, Siyu Yao<sup>4\*</sup>*

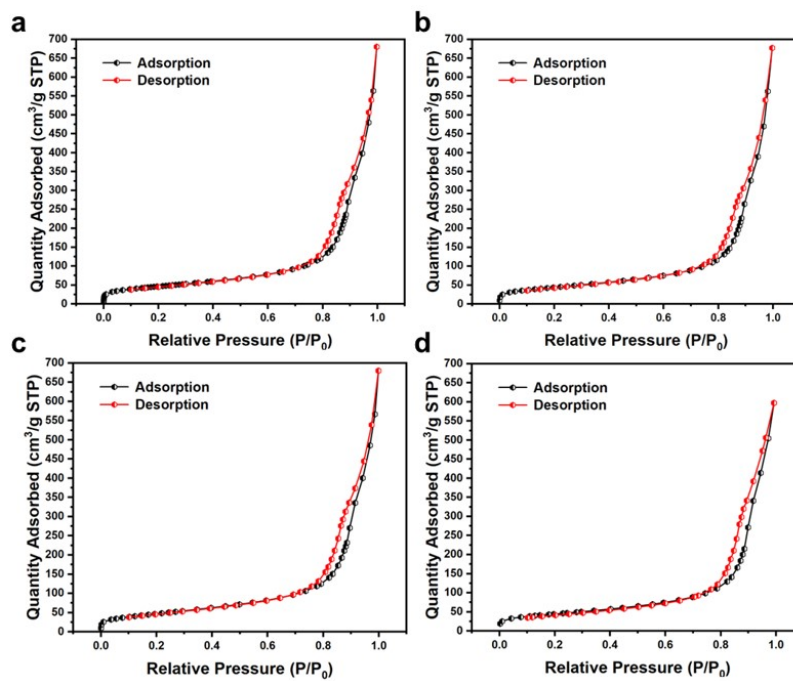

**Fig. S1** N<sub>2</sub> adsorption-desorption isotherms of Ru/ $\gamma$ -Al<sub>2</sub>O<sub>3</sub> catalysts with different Ru particle sizes. a. Ru<sub>0.6</sub>/ $\gamma$ -Al<sub>2</sub>O<sub>3</sub>, b. Ru<sub>1.5</sub>/ $\gamma$ -Al<sub>2</sub>O<sub>3</sub>, c. Ru<sub>2.5</sub>/ $\gamma$ -Al<sub>2</sub>O<sub>3</sub>, d. Ru<sub>7.5</sub>/ $\gamma$ -Al<sub>2</sub>O<sub>3</sub> catalysts.

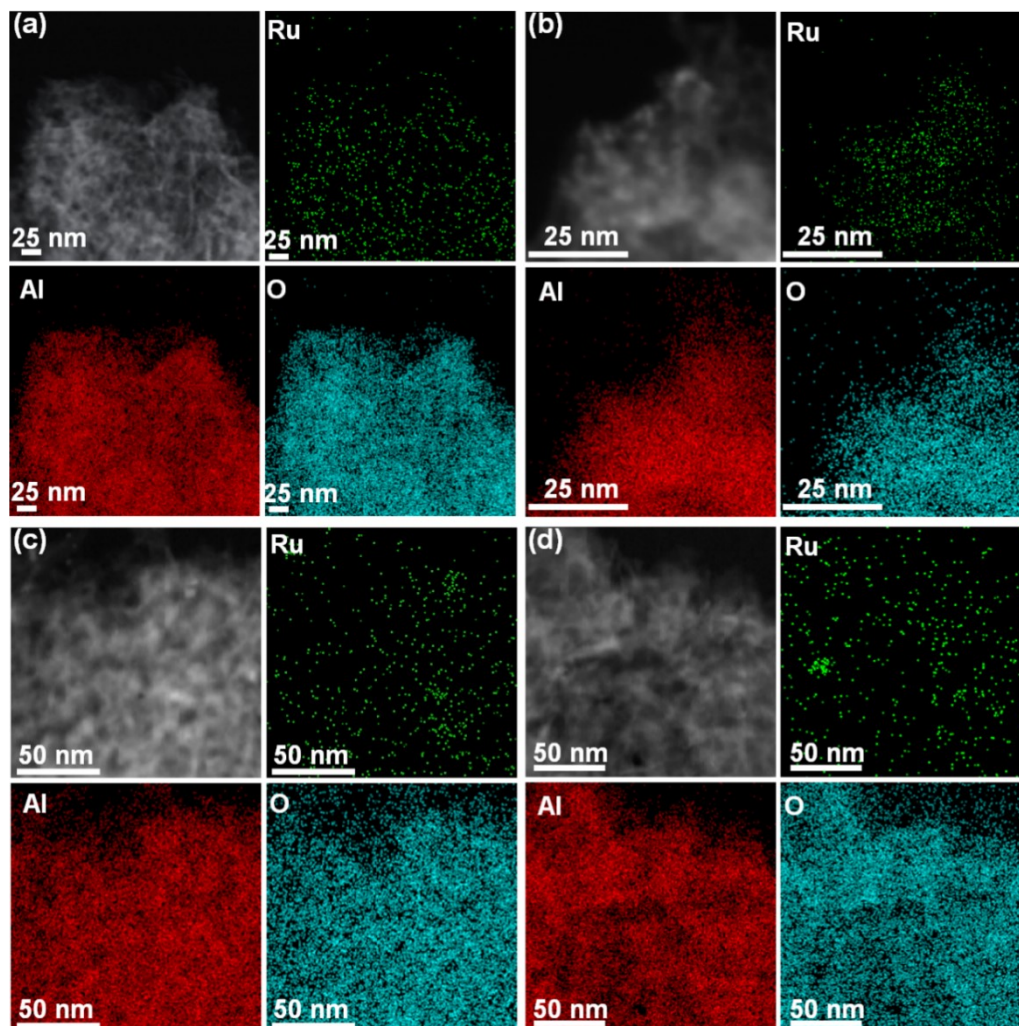

**Fig. S2** STEM images and elemental mappings of Ru/γ-Al<sub>2</sub>O<sub>3</sub> catalysts with different Ru particle sizes. a. Ru<sub>0.6</sub>/γ-Al<sub>2</sub>O<sub>3</sub>, b. Ru<sub>1.5</sub>/γ-Al<sub>2</sub>O<sub>3</sub>, c. Ru<sub>2.5</sub>/γ-Al<sub>2</sub>O<sub>3</sub>, d. Ru<sub>7.5</sub>/γ-Al<sub>2</sub>O<sub>3</sub> catalysts.

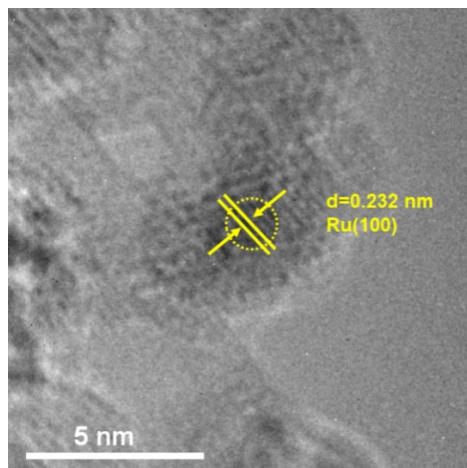

**Fig. S3** High-resolution TEM image of the  $\text{Ru}_{1.5}/\gamma\text{-Al}_2\text{O}_3$  catalyst.

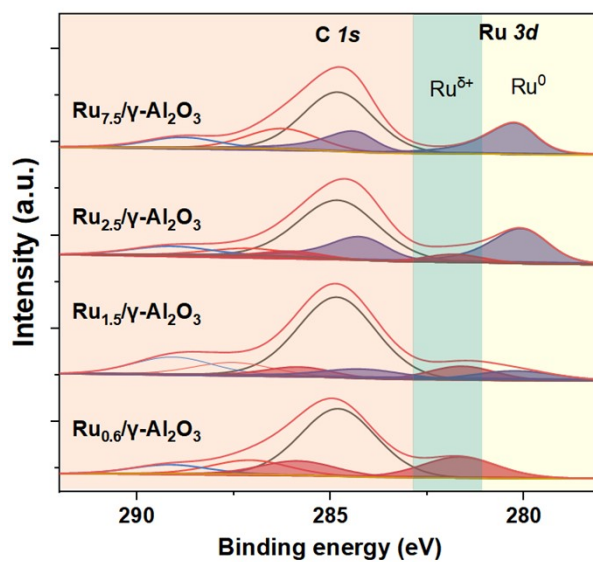

**Fig. S4** Quasi-in-situ XPS of  $\text{Ru}/\gamma\text{-Al}_2\text{O}_3$  catalysts. All catalysts are pre-reduced at 200 °C for 2 h.

**Table S1.** CO-DRIFTS peak assignments and occupied proportion based on fitting results on Ru/ $\gamma$ - $\text{Al}_2\text{O}_3$  catalysts.

| Catalyst                                       | Frequency ( $\text{cm}^{-1}$ ) | Assign                          | Proportion (%) |
|------------------------------------------------|--------------------------------|---------------------------------|----------------|
| $\text{Ru}_{0.6}/\gamma\text{-Al}_2\text{O}_3$ | 2122                           | $\text{Ru}^{\delta+}\text{-CO}$ | 12.9           |
|                                                | 2081                           | $\text{Ru}(\text{CO})_x$        | 78.2           |
|                                                | 2022                           | $\text{Ru-CO}$                  | 8.9            |
| $\text{Ru}_{1.5}/\gamma\text{-Al}_2\text{O}_3$ | 2124                           | $\text{Ru}^{\delta+}\text{-CO}$ | 12.2           |
|                                                | 2072                           | $\text{Ru}(\text{CO})_x$        | 68.3           |
|                                                | 2002                           | $\text{Ru-CO}$                  | 19.5           |
| $\text{Ru}_{2.5}/\gamma\text{-Al}_2\text{O}_3$ | 2128                           | $\text{Ru}^{\delta+}\text{-CO}$ | 14.3           |
|                                                | 2065                           | $\text{Ru}(\text{CO})_x$        | 56.2           |
|                                                | 2025, 2002                     | $\text{Ru-CO}$                  | 29.5           |
| $\text{Ru}_{7.5}/\gamma\text{-Al}_2\text{O}_3$ | 2128                           | $\text{Ru}^{\delta+}\text{-CO}$ | 3.1            |
|                                                | 2068                           | $\text{Ru}(\text{CO})_x$        | 14.5           |
|                                                | 2044, 1992                     | $\text{Ru-CO}$                  | 82.4           |

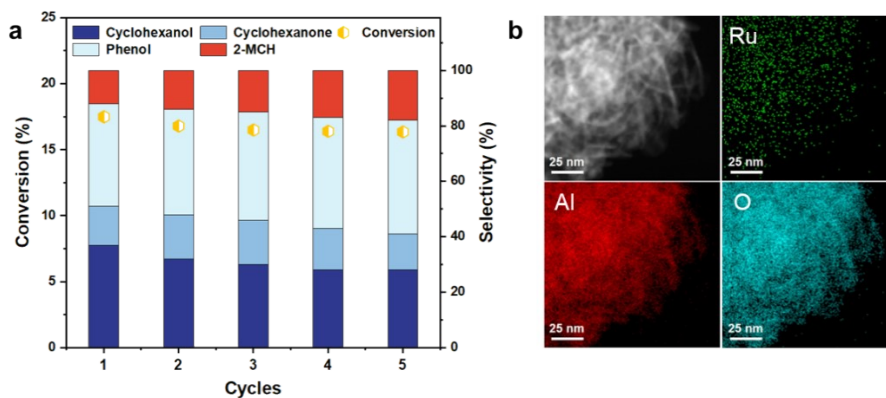

**Fig. S5** a. Cycling stability test under low conversion of the  $\text{Ru}_{1.5}/\gamma\text{-Al}_2\text{O}_3$  catalyst at 190 °C for guaiacol hydrodeoxygenation reaction (Reaction condition: 0.3 mmol guaiacol, 0.01 g catalyst, 3.0 mL  $\text{H}_2\text{O}$ , 5 bar  $\text{H}_2$ , 190 °C, 1/6 h, 400 rpm); b. STEM images and elemental mappings of the used- $\text{Ru}_{1.5}/\gamma\text{-Al}_2\text{O}_3$  catalyst.

**Table S2.** Physicochemical properties of the  $\text{Ru}_{1.5}/\gamma\text{-Al}_2\text{O}_3$  catalysts.

| Catalyst                                                              | Ru <sup>a</sup> (wt %) | S <sub>BET</sub> (m <sup>2</sup> /g) |
|-----------------------------------------------------------------------|------------------------|--------------------------------------|
| $\text{Ru}_{1.5}/\gamma\text{-Al}_2\text{O}_3\text{-Fresh}$           | 1.50                   | 159.1                                |
| $\text{Ru}_{1.5}/\gamma\text{-Al}_2\text{O}_3\text{-Used}^{\text{b}}$ | 1.48                   | 112.8                                |

<sup>a</sup>Measured by inductive coupled plasma-optical emission spectroscopy (ICP-OES) on a Varian ICP-OES 720.

<sup>b</sup>The used catalyst was obtained by centrifugation from the solvent, washed several times with deionized water, and dried overnight in an oven at 60 °C before characterizations.

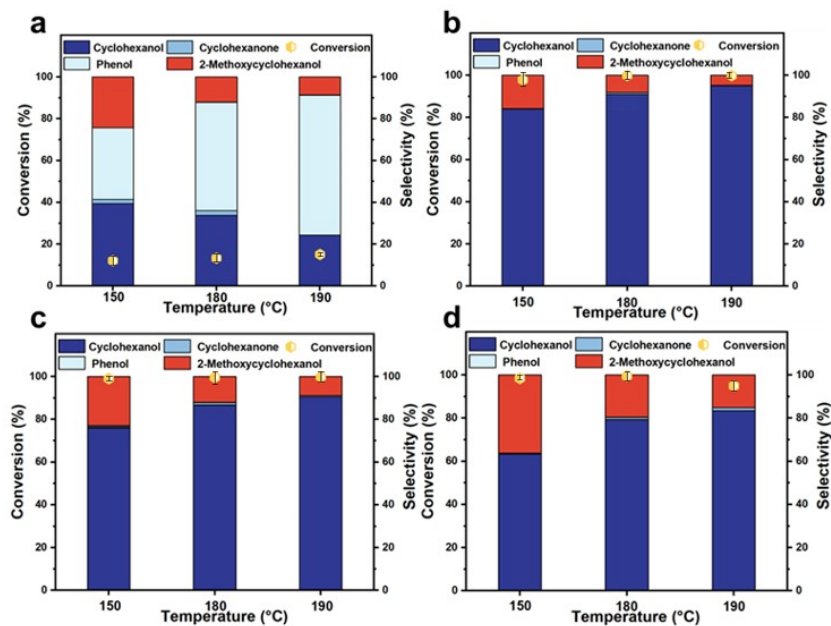

**Fig. S6** Catalytic performance of guaiacol hydrodeoxygenation at different temperatures on a. Ru<sub>0.6</sub>/γ-Al<sub>2</sub>O<sub>3</sub>, b. Ru<sub>1.5</sub>/γ-Al<sub>2</sub>O<sub>3</sub>, c. Ru<sub>2.5</sub>/γ-Al<sub>2</sub>O<sub>3</sub>, d. Ru<sub>7.5</sub>/γ-Al<sub>2</sub>O<sub>3</sub> catalysts (Reaction condition: 0.3 mmol guaiacol, 0.02 g catalyst, 3.0 mL H<sub>2</sub>O, 5 bar H<sub>2</sub>, 6 h, 400 rpm, the error bars show the deviation of guaiacol conversion based on three repeated experiments).

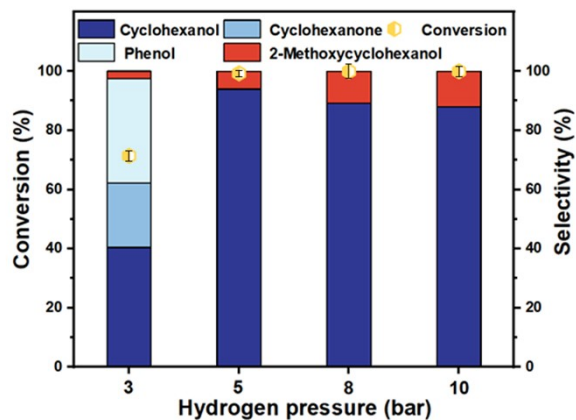

**Fig. S7** Catalytic performance of guaiacol hydrodeoxygenation under different H<sub>2</sub> pressure on the Ru<sub>1.5</sub>/γ-Al<sub>2</sub>O<sub>3</sub> catalyst (Reaction condition: 0.3 mmol guaiacol, 0.02 g catalyst, 3.0 mL H<sub>2</sub>O, 190 °C, 6 h, 400 rpm, the error bars show the deviation of guaiacol conversion based on three repeated experiments).



**Table S3.** State-of-the-art Ru-based catalysts for hydrodeoxygenation of guaiacol to cyclohexanol

| Entry    | Catalyst                                                  | Reaction condition |                            |          |                       | Solvent     | Conv.<br>/% | Cyclohexanol<br>yield<br>/% | Ref. |
|----------|-----------------------------------------------------------|--------------------|----------------------------|----------|-----------------------|-------------|-------------|-----------------------------|------|
|          |                                                           | T<br>/°C           | P(H <sub>2</sub> )<br>/MPa | t<br>/h  |                       |             |             |                             |      |
| <b>1</b> | <b>Ru/Al<sub>2</sub>O<sub>3</sub></b>                     | <b>190</b>         | <b>0.5</b>                 | <b>6</b> | <b>H<sub>2</sub>O</b> | <b>99.9</b> | <b>95.0</b> | <b>This<br/>work</b>        |      |
| 2        | Ru/TiO <sub>2</sub>                                       | 240                | 1.0                        | 1        | dioxane               | 71.7        | 51.0        | 1                           |      |
| 3        | Ru/C                                                      | 200                | -                          | 5        | isopropanol           | 99.0        | 70.0        | 2                           |      |
| 4        | Ru-MnO/CNTs                                               | 200                | 2.0                        | 3.33     | decahydronaphthalene  | 99.4        | 85.8        | 3                           |      |
| 5        | 2Ru2.5Fe/Al <sub>2</sub> O <sub>3</sub>                   | 240                | 3.0                        | 4        | n-octane              | 99.9        | 81.3        | 4                           |      |
| 6        | Ru <sub>1</sub> /CeO <sub>2</sub>                         | 200                | 1.0                        | 6        | H <sub>2</sub> O      | 99.9        | 99.9        | 5                           |      |
| 7        | RuMn/Al <sub>2</sub> O <sub>3</sub> -<br>SiO <sub>2</sub> | 180                | 2.0                        | 4        | H <sub>2</sub> O      | 100.0       | 96.8        | 6                           |      |
| 8        | Ru/MgO-ZrO <sub>2</sub>                                   | 250                | 1.0                        | 1.5      | H <sub>2</sub> O      | 100.0       | 83.1        | 7                           |      |
| 9        | Ru/TiO <sub>2</sub> -cSiO <sub>2</sub>                    | 160                | 1.5                        | 1.67     | H <sub>2</sub> O      | 100.0       | 84.2        | 8                           |      |
| 10       | Ru/ZnAlPWO                                                | 250                | 2.0                        | 1        | H <sub>2</sub> O      | 100.0       | 90.0        | 9                           |      |
| 11       | Ru-MnO <sub>x</sub> /C                                    | 160                | 1.5                        | 4        | H <sub>2</sub> O      | 100.0       | 81.0        | 10                          |      |
| 12       | Ru/C+MgO                                                  | 160                | 1.5                        | 2        | H <sub>2</sub> O      | 98.0        | 79.0        | 11                          |      |
| 13       | Ru/Al <sub>2</sub> O <sub>3</sub>                         | 225                | 1.0                        | 4        | cyclohexane           | 100.0       | 82.0        | 12                          |      |
| 14       | Ru/Al <sub>2</sub> O <sub>3</sub>                         | 225                | 0                          | 2        | isopropanol           | 100.0       | 74.0        | 13                          |      |
| 15       | Ru/C                                                      | 140                | 3.0                        | 4        | CH <sub>3</sub> COOH  | 84.0        | 63.0        | 14                          |      |
| 16       | Ru-PAF-30                                                 | 250                | 3.0                        | 1        | H <sub>2</sub> O      | 100.0       | 64.0        | 15                          |      |
| 17       | HRO/Mg(OH) <sub>2</sub>                                   | 160                | 1.0                        | 6        | H <sub>2</sub> O      | 100.0       | 89.0        | 16                          |      |

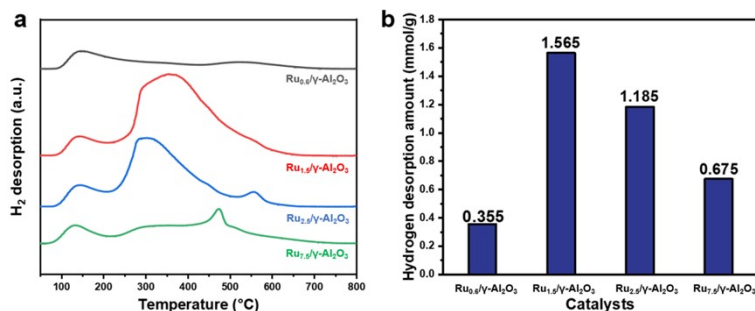

**Fig. S8** a. H<sub>2</sub>-TPD results; and b. the corresponding H<sub>2</sub> adsorption capacity of Ru/γ-Al<sub>2</sub>O<sub>3</sub> catalysts.

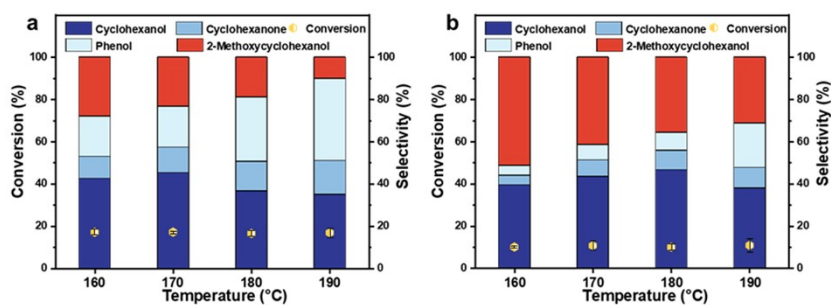

**Fig. S9** Catalytic performances of a. the Ru<sub>1.5</sub>/γ-Al<sub>2</sub>O<sub>3</sub> and b. the Ru<sub>7.5</sub>/γ-Al<sub>2</sub>O<sub>3</sub> at low conversion level of ~15 % at different temperatures. (Reaction condition: 0.3 mmol guaiacol, 0.01 g catalyst, 3.0 mL H<sub>2</sub>O, 5 bar H<sub>2</sub>, 1/6 h, 400 rpm, the error bars show the deviation of guaiacol conversion based on three repeated experiments).

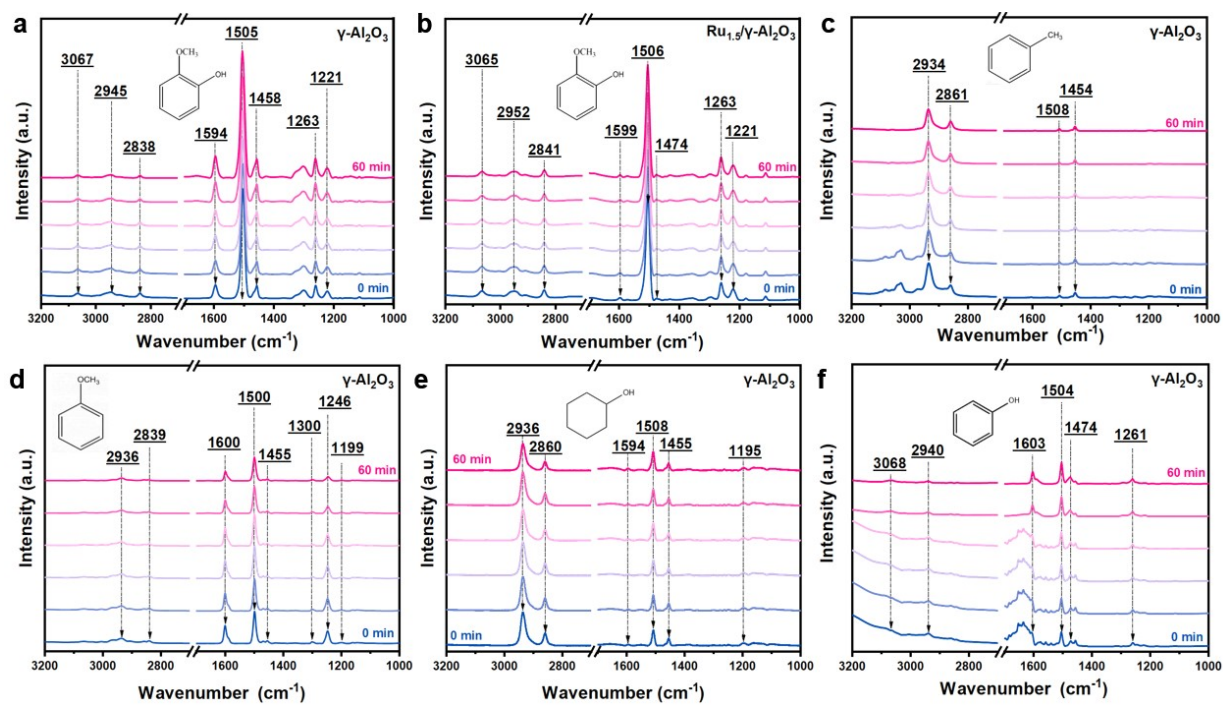

**Fig. S10** In situ DRIFTS of adsorption with a. guaiacol on  $\gamma\text{-Al}_2\text{O}_3$ , b. guaiacol on  $\text{Ru}_{1.5}/\gamma\text{-Al}_2\text{O}_3$ , c. methylbenzene on  $\gamma\text{-Al}_2\text{O}_3$ , d. anisole on  $\gamma\text{-Al}_2\text{O}_3$ , e. cyclohexanol on  $\gamma\text{-Al}_2\text{O}_3$ , and f. phenol aqueous solution on  $\gamma\text{-Al}_2\text{O}_3$ , at 50 °C.

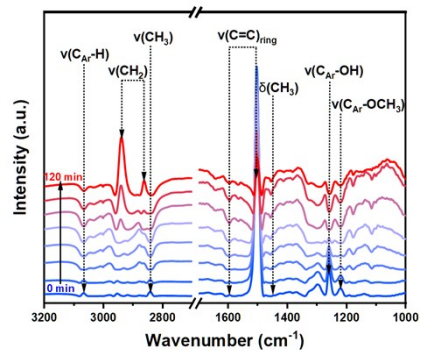

**Fig. S11** In situ DRIFTS of the adsorbed intermediate hydrogenation on  $\text{Ru}_{1.5}/\gamma\text{-Al}_2\text{O}_3$  catalyst at 150 °C with the inlet gas switched from Ar to 20%  $\text{H}_2$  for 120 min.

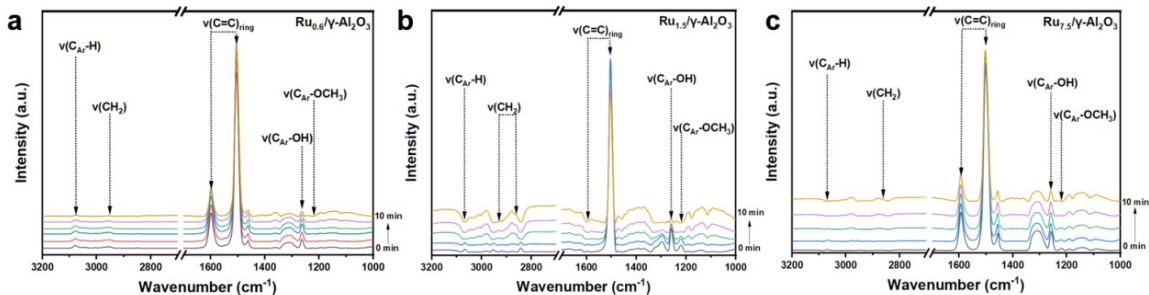

**Fig. S12** In situ DRIFTS of the adsorbed intermediate hydrogenation on a.  $\text{Ru}_{0.6}/\gamma\text{-Al}_2\text{O}_3$ , b.  $\text{Ru}_{1.5}/\gamma\text{-Al}_2\text{O}_3$  and c.  $\text{Ru}_{7.5}/\gamma\text{-Al}_2\text{O}_3$  catalysts at 150 °C with the inlet gas switched from Ar to 20%  $\text{H}_2$  for 10 min.

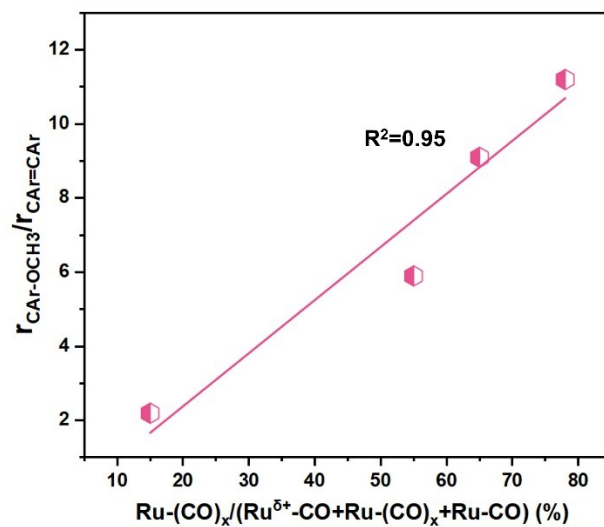

**Fig. S13** The relationship between the proportion of low coordinated Ru sites and the relative ratio of  $r_{\text{CAR-OCH}_3} / r_{\text{CAR=CAr}}$  of guaiacol.

**Table S4.** Formulas to calculate the atom numbers at different sites for each Ru particle <sup>18</sup>

| Different sites                                               | Formulas <sup>a</sup>     |
|---------------------------------------------------------------|---------------------------|
| Total atom number of each particle ( $N_T$ <sup>b</sup> )     | $0.25(14m^3-21m^2+14m-4)$ |
| Surface atom number of each particle ( $N_s$ )                | $7.5m^2-14m+6$            |
| Corner atom number of each particle ( $N_{\text{corner}}$ )   | 12                        |
| Edge atom number of each particle ( $N_{\text{edge}}$ )       | $18m-40$                  |
| Terrace atom number of each particle ( $N_{\text{Terrace}}$ ) | $7.5m^2-32m+34$           |

<sup>a</sup> m is the number of atoms lying on an equivalent edge (corner atoms included).

<sup>b</sup> the particle size with the  $N_T$  in one truncated bipyramid follows the relationship of  $1.105 \times N_T^{1/3} \times d_{\text{Ru atom}}$  ( $d_{\text{Ru atom}}=0.268$  nm).

For the fraction of each typed active site per mole of Ru:  $y_i=N_i/N_T$ .

Given the used mole of Ru in each reaction was kept the same ( $n_{\text{Ru}}=0.002/M_{\text{Ru}}$ ), the particle numbers of each type active site per mole of Ru were also calculated:

$N_p=n_{\text{Ru}} \cdot N_A/N_T=(0.002/M_{\text{Ru}}) \cdot N_A/N_T$ ,  $N_A$  is the Avogadro constant and  $M_{\text{Ru}}$  is the molecular weight.

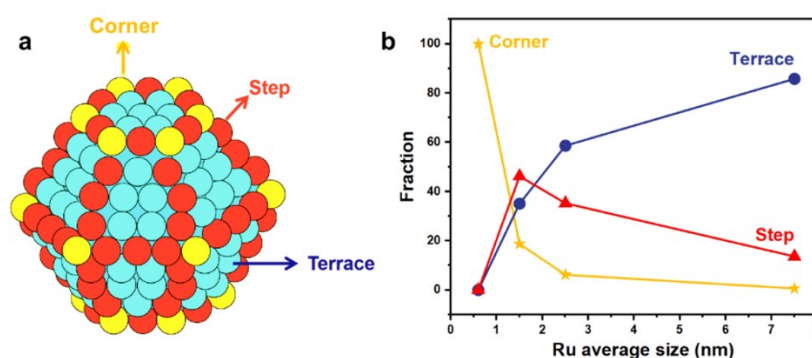

**Fig. S14 a.** Truncated hexagonal bipyramid structure model; **b.** The proportion of different surface sites obtained from theoretical proportion based on Fig. S14a as a function of Ru particle size.

## References

1. X. Wang, P. Wu, Z. Wang, L. Zhou, Y. Liu, H. Cheng, M. Arai, C. Zhang and F. Zhao, *ACS Sustainable Chem. Eng.*, 2021, 9, 3083-3094.
2. M. Kim, J.-M. Ha, K.-Y. Lee and J. Jae, *Catal Commun.*, 2016, 86, 113-118.
3. W. Long, P. Liu, W. Xiong, F. Hao and H. a. Luo, *Can. J. Chem.*, 2019, 98, 57-65.
4. T. Liu, Z. Tian, W. Zhang, B. Luo, L. Lei, C. Wang, J. Liu, R. Shu and Y. Chen, *Fuel*, 2023, 339, 126916.
5. K. Zhang, Q. Meng, H. Wu, J. Yan, X. Mei, P. An, L. Zheng, J. Zhang, M. He and B. Han, *J. Am. Chem. Soc.* 2022, 144, 20834-20846.
6. M. Chen, Q. Zhong, M. Zhang, H. Huang, Y. Liu and Z. Wei, *Catal Commun.*, 2022, 172, 106550.
7. M. Zhang, L. Xiang, G. Fan, L. Yang and F. Li, *Mol. Catal.*, 2022, 533, 112794.
8. B. Han, Z. Bao, T. Liu, H. Zhou, G. Zhuang, X. Zhong, S. Deng and J. Wang, *ChemistrySelect*, 2017, 2, 9599-9606.
9. Z. Wang, A. Wang, L. Yang, G. Fan and F. Li, *Mol. Catal.*, 2022, 528, 112503.
10. M. Ishikawa, M. Tamura, Y. Nakagawa and K. Tomishige, *Appl Catal B-Environ.*, 2016, 182, 193-203.
11. Y. Nakagawa, M. Ishikawa, M. Tamura and K. Tomishige, *Green Chem.*, 2014, 16, 2197-2203.
12. D. Singh and P. L. Dhepe, *Mol. Catal.*, 2020, 480, 110525.
13. T. S. Khan, D. Singh, P. P. Samal, S. Krishnamurty and P. L. Dhepe, *ACS Sustainable Chem. Eng.*, 2021, 9, 14040-14050.
14. C. E. J. J. Vriamont, T. Chen, C. Romain, P. Corbett, P. Manageracharath, J. Peet, C. M. Conifer, J. P. Hallett and G. J. P. Britovsek, *ACS Catal.*, 2019, 9, 2345-2354.
15. L. A. Kulikov, M. A. Bazhenova, D. A. Makeeva, M. V. Terenina, A. L. Maximov and E. A. Karakhanov, *Petroleum Chemistry*, 2022, 62, 1096-1106.
16. S. Gundekari, B. Biswas, T. Bhaskar and K. Srinivasan, *Biomass Bioenergy*, 2022, 161,

106448.

17. W. Zhao, Z. Zhang, B. Wang, Y. Lv, L. Huang and P. Liu, *Appl. Catal., A*, 2024, 678, 119711.

18. M. Ye, Y. Li, Z. Yang, C. Yao, W. Sun, X. Zhang, W. Chen, G. Qian, X. Duan, Y. Cao, L. Li, X. Zhou and J. Zhang, *Angew. Chem. Int. Ed.*, 2023, 62, e202301024.
